# Supplementary material for: Mutations in the ND2 Subunit of Mitochondrial Complex I Are Sufficient to Confer Increased Tumorigenic and Metastatic Potential to Cancer Cells
Source: PubMed Central journal article supplement (PMC6678765; doi:10.3390/cancers11071027), 2019-07-21
Supplement: cancers-11-01027-s001.pdf [file cancers-11-01027-s001.pdf]

## Supplemental Materials

# Mutations in the *ND2* Subunit of Mitochondrial Complex I Are Sufficient to Confer Increased Tumorigenic and Metastatic Potential to Cancer Cells

Joaquín Marco-Brualla, Sameer Al-Wasaby, Ruth Soler, Eduardo Romanos, Blanca Conde, Raquel Justo-Méndez, José A. Enríquez, Patricio Fernández-Silva, Luis Martínez-Lostao, Martín Villalba, Raquel Moreno-Loshuertos and Alberto Anel

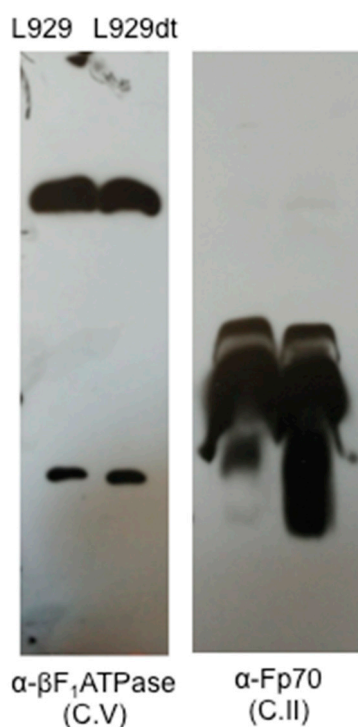

**Figure S1.** Expression of complex V ( $\alpha$ - $\beta$ F<sub>1</sub>ATPase) in L929 and L929dt cells. Mitochondria from both cell lines were isolated and permeabilized using digitonin and mtETC complexes and supercomplexes were separated using BNGE. Afterwards, proteins were transferred to a membrane and probed with monoclonal antibodies for (anti- $\beta$ -F<sub>1</sub>ATPase) and CII (anti-Fp70). Western-Blotting of complex II ( $\alpha$ -Fp70) was used as loading control.

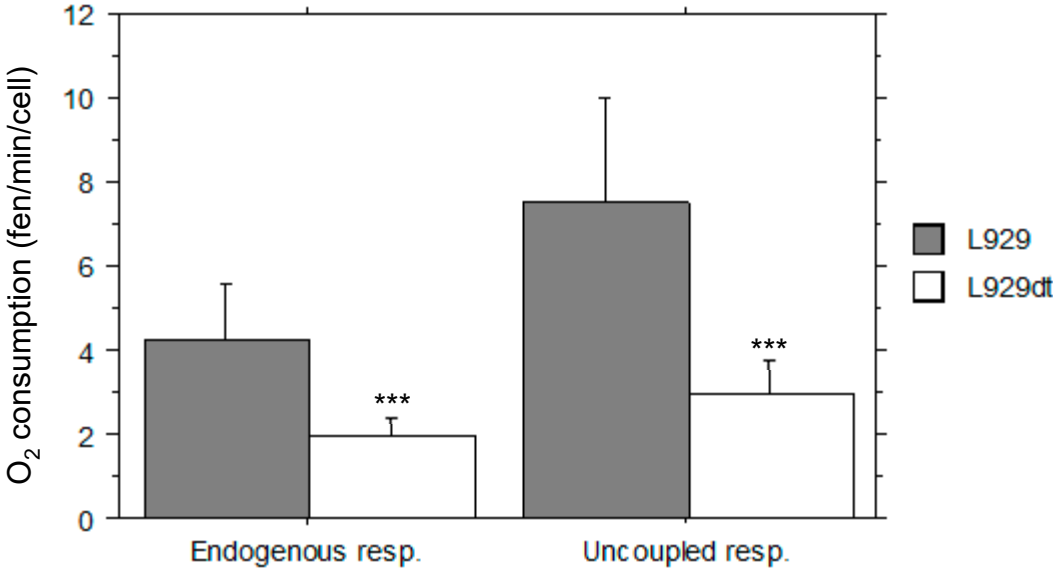

**Figure S2.** Oxygen consumption of L929 and L929dt cells, expressed as endogenous and uncoupled respiration. Data shown correspond to mean +/- SD of n ≥ 6. \*\*\* *p* < 0.001.

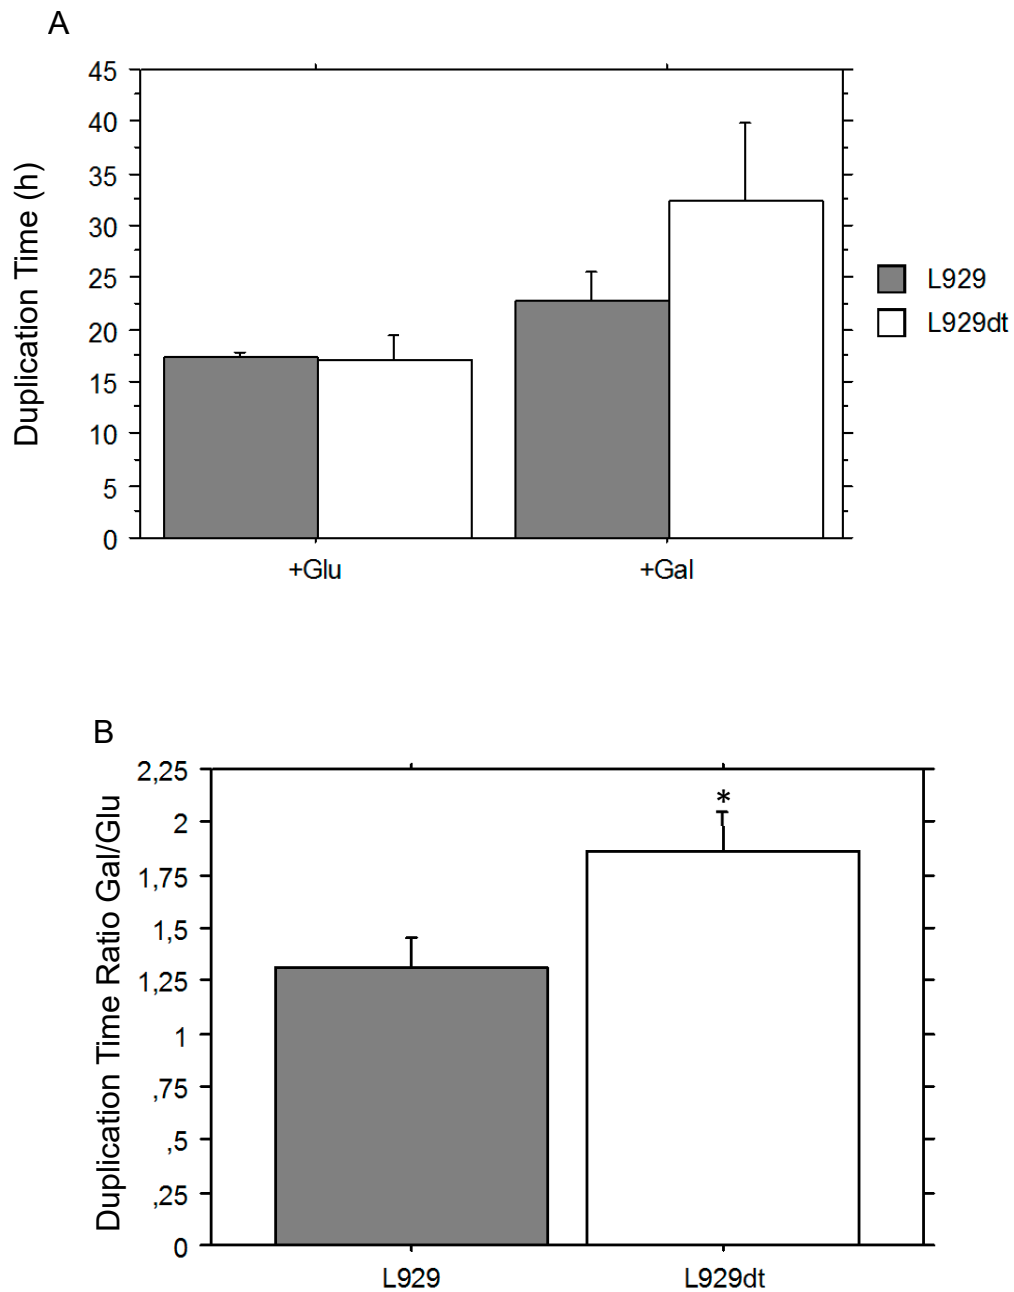

**Figure S3.** Duplication time of L929 and L929dt cells, in the presence of (A) glucose (Glu) or galactose (Gal); and (B) calculated as Duplication Time ratio of Glu/Gal, showed as the mean  $\pm$  SD of  $n = 3$  (L929) and  $n = 2$  (L929dt). \*  $p < 0.05$ .

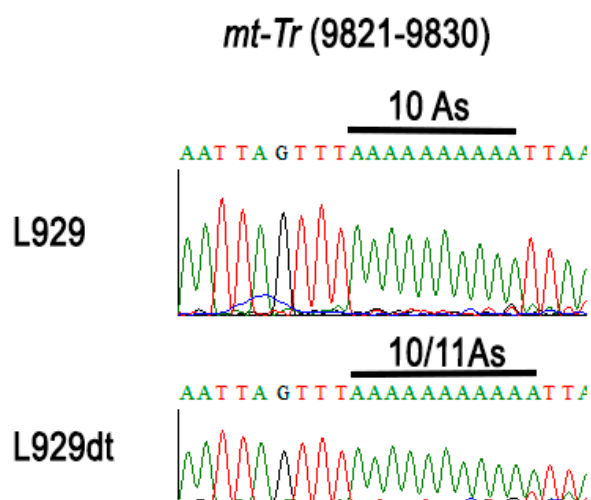

**Figure S4.** Alanine repetitions in L929 and L929dt cells. Chromatograms showing the heteroplasmic insertion of an adenine in the polymorphic adenine track of the *mt-Tr* gene in L929dt cells.

**Table S1.** PCR primers.

| Fragment | Oligo name | Position (NC_005089) | Sequence                | Fragment size |
|----------|------------|----------------------|-------------------------|---------------|
| 1        | 1F         | 1918–1939            | ACAAGAACCCCGCCTGTTTACC  | 1607          |
|          | 1R         | 3504–3525            | AGTTAGTTGAGTAGAGTTCTGG  |               |
| 2        | 2F         | 3269–3291            | ATTACTTCTGCCAGCCTGACCCA | 1522          |
|          | 2R         | 4802–4821            | GTTAGTGAAGTGAATAAAAT    |               |
| 3        | 3F         | 3862–3883            | AAGCTATCGGGCCCATACCCCG  | 1343          |
|          | 3R         | 5184–5205            | CTCTACTAAGACTTCTACCGCC  |               |
| 4        | 4F         | 9072–9093            | CGAAACCACATAAAATCAAGCCC | 1973          |
|          | 4R         | 11024–11045          | GTGGCTAACTGAGGAGTAGGCG  |               |
| 5        | 5F         | 10803–10824          | CACCTATGACTACCAAAGCCC   | 1361          |
|          | 5R         | 12186–12164          | TTCCCACCCCTTCTCAGCCAATG |               |
| 6        | 6F         | 11703–11724          | TAGGAACCAAAAACCTTGGTGC  | 1221          |
|          | 6R         | 12903–12924          | TTAGGTCTTTTGAGTAGAACCC  |               |
| 7        | 7F         | 12385–12406          | GCCTATTAATCGCAGCTACAGG  | 1844          |
|          | 7R         | 14208–14229          | ATGAAATGTTGGATGGGGCAGG  |               |

**Table S2.** Sequencing primers.

| Fragment | Primer name | Position    | Sequence               |
|----------|-------------|-------------|------------------------|
| 1        | 1a          | 2572–2593   | GGACAAGAGAAATAGAGCCACC |
|          | 1b          | 3010–3031   | TTCCCCTACCAATACCACACCC |
| 2        | 2a          | 3269–3290   | ATTACTTCTGCCAGCCTGACCC |
|          | 3a          | 3862–3883   | AAGCTATCGGGCCCATACCCCG |
| 3        | 3b          | 4448–4469   | ATAGCCTATTCATCAATTGCC  |
|          | 4a          | 9301–9322   | ACTTCGGATTTGAAGCCGCAGC |
| 4        | 4b          | 9745–9766   | CAATTCTATCTCTAGGCCTAGC |
|          | 4c          | 10326–10347 | AATATATTCTCCTCAGACCC   |
| 5        | 5a          | 10803–10824 | CACCTATGACTACCAAAGCCC  |
|          | 5b          | 11460–11481 | CGAGAACTAACACTAATAGCCC |
| 6        | 6a          | 12000–12021 | ATCCTGTTTACATCTGTAGCCC |
|          | 6b          | 12255–12276 | ATCCTCTATAACCGCATCGGAG |
| 7        | 7a          | 12852–12873 | TCATGCCTAGTAATCGGAAGCC |
|          | 7b          | 13423–13444 | CCATCCCAAATCCACCTCAAC  |

Table S3. RFLP analysis.

| Mutation | Forward primer position | Reverse primer position | Restriction enzyme name | L929 fragments (4206/4859C) | L929dt fragments (4206/4859T) |
|----------|-------------------------|-------------------------|-------------------------|-----------------------------|-------------------------------|
| C4206T   | 3862–3884               | 4236–4258               | SspI                    | 306+118 bp                  | 306+79+39 bp                  |
| C4859T   | 4448–4470               | 5184–5205               | HphI                    | 433+304 bp                  | 737 bp                        |

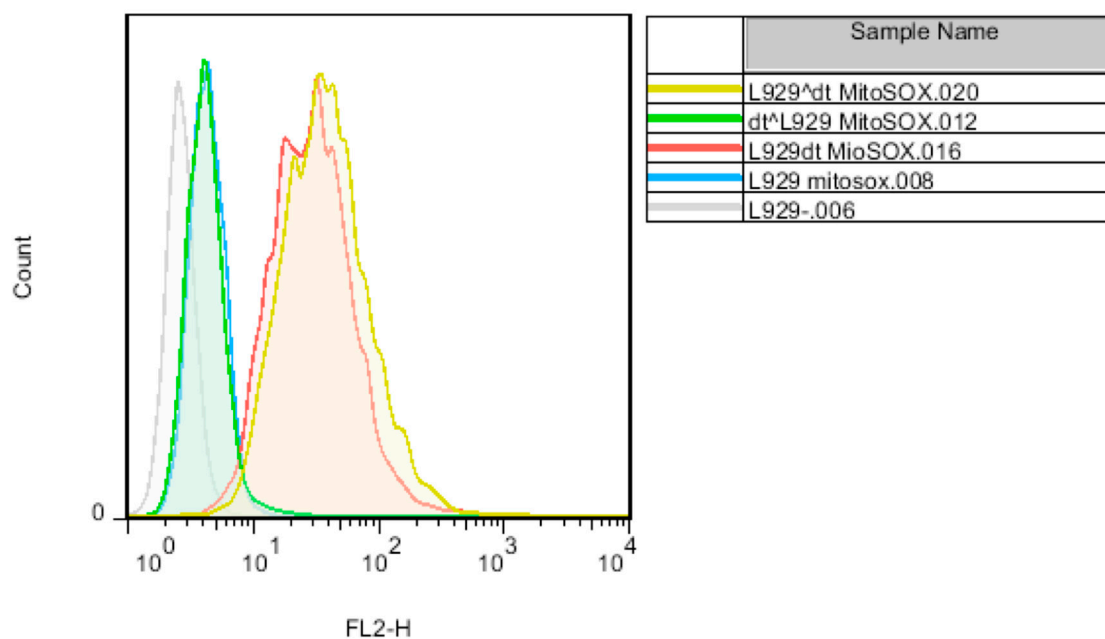

**Figure S5.** Determination of the amount of mitochondrial superoxide anion in basal conditions using the Mitosox method in L929 (blue histogram) or L929dt cells (red histogram) or in the mitochondrial cybrids L929dt<sup>L929</sup> (green histogram) or L929<sup>dt</sup> (yellow histogram).
